# Supplementary material for: Healthy Japanese dietary pattern is associated with slower biological aging in older men: WASEDA’S health study
Source: PubMed Central journal article supplement (PMC11157009; doi:10.3389/fnut.2024.1373806), 2024-05-24
Supplement: Table_1.pdf [file Table_1.pdf]

Supplemental data

Table S1. Correlations between chronological age and each epigenetic age (predicted age).

|                   |          | Horvath Clock | Hannum Clock   | BioAge4HASstatic | DNAmAge<br>SkinBloodClock | DNAmPhenoAge | DNAmGrimAge       | DNAmFitAge        | DNAmTL |
|-------------------|----------|---------------|----------------|------------------|---------------------------|--------------|-------------------|-------------------|--------|
| Chronological Age | <i>r</i> | 0.083         | <b>0.232**</b> | <b>0.217**</b>   | <b>0.317**</b>            | 0.057        | <b>0.379**</b>    | <b>0.368**</b>    | -0.139 |
|                   | <i>p</i> | 0.321         | <b>0.005</b>   | <b>0.009</b>     | <b>&lt; 0.001</b>         | 0.501        | <b>&lt; 0.001</b> | <b>&lt; 0.001</b> | 0.097  |
|                   | <i>n</i> | 144           | <b>144</b>     | <b>144</b>       | <b>144</b>                | 144          | <b>144</b>        | <b>144</b>        | 144    |

TL, telomere length. Significant correlations at  $p < 0.01$  are indicated by \*\*.

Table S2. Correlations between each epigenetic age acceleration and age-adjusted values.

|                            |          | AgeAccelHorvath   | AgeAccelHannum    | BioAge4HASstatic<br>AdjAge | SkinBloodClock<br>AdjAge | AgeAccelPheno     | AgeAccelGrim      | FitAgeAccel       | DNAmTL<br>AdjAge  |
|----------------------------|----------|-------------------|-------------------|----------------------------|--------------------------|-------------------|-------------------|-------------------|-------------------|
| AgeAccelHorvath            | <i>r</i> |                   | <b>0.527**</b>    | <b>0.510**</b>             | <b>0.469**</b>           | <b>0.356**</b>    | 0.135             | <b>0.395**</b>    | <b>-0.212*</b>    |
|                            | <i>p</i> |                   | <b>&lt; 0.001</b> | <b>&lt; 0.001</b>          | <b>&lt; 0.001</b>        | <b>&lt; 0.001</b> | 0.107             | <b>&lt; 0.001</b> | <b>0.011</b>      |
|                            | <i>n</i> |                   | <b>144</b>        | <b>144</b>                 | <b>144</b>               | <b>144</b>        | 144               | <b>144</b>        | <b>144</b>        |
| AgeAccelHannum             | <i>r</i> | <b>0.527**</b>    |                   | <b>0.962**</b>             | <b>0.561**</b>           | <b>0.502**</b>    | <b>0.207*</b>     | <b>0.476**</b>    | <b>-0.305**</b>   |
|                            | <i>p</i> | <b>&lt; 0.001</b> |                   | <b>&lt; 0.001</b>          | <b>&lt; 0.001</b>        | <b>&lt; 0.001</b> | <b>0.013</b>      | <b>&lt; 0.001</b> | <b>&lt; 0.001</b> |
|                            | <i>n</i> | <b>144</b>        |                   | <b>144</b>                 | <b>144</b>               | <b>144</b>        | <b>144</b>        | <b>144</b>        | <b>144</b>        |
| BioAge4HASstatic<br>AdjAge | <i>r</i> | <b>0.510**</b>    | <b>0.962**</b>    |                            | <b>0.538**</b>           | <b>0.526**</b>    | <b>0.211*</b>     | <b>0.492**</b>    | <b>-0.336**</b>   |
|                            | <i>p</i> | <b>&lt; 0.001</b> | <b>&lt; 0.001</b> |                            | <b>&lt; 0.001</b>        | <b>&lt; 0.001</b> | <b>0.011</b>      | <b>&lt; 0.001</b> | <b>&lt; 0.001</b> |
|                            | <i>n</i> | <b>144</b>        | <b>144</b>        |                            | <b>144</b>               | <b>144</b>        | <b>144</b>        | <b>144</b>        | <b>144</b>        |
| SkinBloodClock<br>AdjAge   | <i>r</i> | <b>0.469**</b>    | <b>0.561**</b>    | <b>0.538**</b>             |                          | <b>0.302**</b>    | 0.126             | <b>0.391**</b>    | <b>-0.181*</b>    |
|                            | <i>p</i> | <b>&lt; 0.001</b> | <b>&lt; 0.001</b> | <b>&lt; 0.001</b>          |                          | <b>&lt; 0.001</b> | 0.132             | <b>&lt; 0.001</b> | <b>0.030</b>      |
|                            | <i>n</i> | <b>144</b>        | <b>144</b>        | <b>144</b>                 |                          | <b>144</b>        | 144               | <b>144</b>        | <b>144</b>        |
| AgeAccelPheno              | <i>r</i> | <b>0.356**</b>    | <b>0.502**</b>    | <b>0.526**</b>             | <b>0.302**</b>           |                   | <b>0.455**</b>    | <b>0.546**</b>    | <b>-0.249**</b>   |
|                            | <i>p</i> | <b>&lt; 0.001</b> | <b>&lt; 0.001</b> | <b>&lt; 0.001</b>          | <b>&lt; 0.001</b>        |                   | <b>&lt; 0.001</b> | <b>&lt; 0.001</b> | <b>0.003</b>      |
|                            | <i>n</i> | <b>144</b>        | <b>144</b>        | <b>144</b>                 | <b>144</b>               |                   | <b>144</b>        | <b>144</b>        | <b>144</b>        |
| AgeAccelGrim               | <i>r</i> | 0.135             | <b>0.207*</b>     | <b>0.211*</b>              | 0.126                    | <b>0.455**</b>    |                   | <b>0.744**</b>    | <b>-0.208*</b>    |
|                            | <i>p</i> | 0.107             | <b>0.013</b>      | <b>0.011</b>               | 0.132                    | <b>&lt; 0.001</b> |                   | <b>&lt; 0.001</b> | <b>0.012</b>      |
|                            | <i>n</i> | 144               | <b>144</b>        | <b>144</b>                 | 144                      | <b>144</b>        |                   | <b>144</b>        | <b>144</b>        |
| FitAgeAccel                | <i>r</i> | <b>0.395**</b>    | <b>0.476**</b>    | <b>0.492**</b>             | <b>0.391**</b>           | <b>0.546**</b>    | <b>0.744**</b>    |                   | <b>-0.491**</b>   |
|                            | <i>p</i> | <b>&lt; 0.001</b> | <b>&lt; 0.001</b> | <b>&lt; 0.001</b>          | <b>&lt; 0.001</b>        | <b>&lt; 0.001</b> | <b>&lt; 0.001</b> |                   | <b>&lt; 0.001</b> |
|                            | <i>n</i> | <b>144</b>        | <b>144</b>        | <b>144</b>                 | <b>144</b>               | <b>144</b>        | <b>144</b>        |                   | <b>144</b>        |
| DNAmTL<br>AdjAge           | <i>r</i> | <b>-0.212*</b>    | <b>-0.305**</b>   | <b>-0.336**</b>            | <b>-0.181*</b>           | <b>-0.249**</b>   | <b>-0.208*</b>    | <b>-0.491**</b>   |                   |
|                            | <i>p</i> | <b>0.011</b>      | <b>&lt; 0.001</b> | <b>&lt; 0.001</b>          | <b>0.030</b>             | <b>0.003</b>      | <b>0.012</b>      | <b>&lt; 0.001</b> |                   |
|                            | <i>n</i> | <b>144</b>        | <b>144</b>        | <b>144</b>                 | <b>144</b>               | <b>144</b>        | <b>144</b>        | <b>144</b>        |                   |

AgeAccel, age acceleration; AdjAge, age adjusted values; TL, telomere length. Significant correlations at  $p < 0.05$  and  $p < 0.01$  are indicated by \* and \*\*.

Table S3. Association between dietary patterns and epigenetic age acceleration and age-adjusted values by single regression analysis.

|                                         | B       | 95%CI            | <i>p</i>     | R <sup>2</sup> |
|-----------------------------------------|---------|------------------|--------------|----------------|
| <i>Healthy Japanese dietary pattern</i> |         |                  |              |                |
| AgeAccelHorvath                         | -4.559  | -12.527 – 3.409  | 0.260        | 0.009          |
| AgeAccelHannum                          | -4.293  | -10.846 – 2.26   | 0.197        | 0.012          |
| BioAge4HASstaticAdjAge                  | -4.737  | -12.924 – 3.451  | 0.255        | 0.009          |
| DNAmSkinBloodClockAdjAge                | -1.121  | -6.184 – 3.942   | 0.662        | 0.001          |
| AgeAccelPheno                           | -10.474 | -20.179 – -0.769 | <b>0.035</b> | 0.031          |
| AgeAccelGrim                            | -9.152  | -14.635 – -3.667 | <b>0.001</b> | 0.071          |
| FitAgeAccel                             | -6.488  | -12.314 – -0.662 | <b>0.029</b> | 0.033          |
| DNAmTLAdjAge                            | 0.372   | 0.071 – 0.673    | <b>0.016</b> | 0.040          |
| <i>Western-style dietary pattern</i>    |         |                  |              |                |
| AgeAccelHorvath                         | -0.105  | -0.632 – 0.841   | 0.779        | 0.001          |
| AgeAccelHannum                          | -0.062  | -0.668 – 0.545   | 0.841        | 0.0003         |
| BioAge4HASstaticAdjAge                  | -0.139  | -0.895 – 0.618   | 0.717        | 0.001          |
| DNAmSkinBloodClockAdjAge                | -0.087  | -0.553 – 0.379   | 0.714        | 0.001          |
| AgeAccelPheno                           | -0.025  | -0.932 – 0.882   | 0.957        | 0.00002        |
| AgeAccelGrim                            | 0.43    | -0.089 – 0.949   | 0.104        | 0.019          |
| FitAgeAccel                             | 0.368   | -0.174 – 0.910   | 0.181        | 0.013          |
| DNAmTLAdjAge                            | 0.008   | -0.021 – 0.036   | 0.597        | 0.002          |

AgeAccel, age acceleration; AdjAge, age adjusted values; B: regression coefficient; CI: confidence interval; R<sup>2</sup>: coefficient of determination; TL, telomere length.

Table S4. Multiple regression analysis of epigenetic age accelerations in the healthy Japanese dietary pattern.

|                                                            | B      | 95%CI           | $\beta$ | VIF   | <i>p</i>          |
|------------------------------------------------------------|--------|-----------------|---------|-------|-------------------|
| <b><i>AgeAccelGrim</i><sup>*1</sup></b>                    |        |                 |         |       |                   |
| Intercept                                                  | 3.066  | -7.590 – 13.721 |         |       | 0.570             |
| Log <sup>10</sup> (Healthy Japanese dietary pattern score) | -4.843 | -10.723 – 1.038 | -0.139  | 1.222 | 0.106             |
| BMI                                                        | 0.025  | -0.180 – 0.230  | 0.020   | 1.094 | 0.809             |
| Exercise habit                                             | 0.555  | -0.722 – 1.833  | 0.069   | 1.064 | 0.391             |
| Smoking status                                             | -1.793 | -2.688 – -0.898 | -0.326  | 1.127 | <b>&lt; 0.001</b> |
| Drinking status                                            | -0.127 | -0.307 – 0.053  | -0.119  | 1.212 | 0.164             |
| Marital status                                             | 1.639  | -1.018 – 4.295  | 0.097   | 1.047 | 0.225             |
| Education status                                           | 0.643  | -2.002 – 3.287  | 0.038   | 1.062 | 0.631             |
| Income status                                              | -0.106 | -0.526 – 0.314  | -0.040  | 1.089 | 0.618             |
| <b><i>FitAgeAccel</i><sup>*2</sup></b>                     |        |                 |         |       |                   |
| Intercept                                                  | 5.403  | -11.932 – 9.335 |         |       | 0.365             |
| Log <sup>10</sup> (Healthy Japanese dietary pattern score) | -3.379 | -0.322 – 7.650  | -0.093  | 1.222 | 0.305             |
| BMI                                                        | -0.169 | -0.168 – 0.242  | -0.127  | 1.094 | 0.140             |
| Exercise habit                                             | 0.544  | -0.806 – 1.738  | 0.064   | 1.064 | 0.447             |
| Smoking status                                             | -1.236 | -0.332 – 0.004  | -0.215  | 1.127 | <b>0.015</b>      |
| Drinking status                                            | -0.128 | -2.767 – -0.991 | -0.115  | 1.212 | 0.205             |
| Marital status                                             | 1.202  | -0.728 – 4.520  | 0.068   | 1.047 | 0.418             |
| Education status                                           | 0.864  | -2.249 – 3.012  | 0.049   | 1.062 | 0.559             |
| Income status                                              | -0.180 | -0.522 – 0.315  | -0.066  | 1.089 | 0.442             |

AgeAccel, age acceleration; B: partial regression coefficient; BMI: body mass index; CI: confidence interval;  $\beta$ : standard partial regression coefficient; VIF: variance inflation factor. <sup>\*1</sup>  $R^2 = 0.215$ , adjusted  $R^2 = 0.167$ ; <sup>\*2</sup>  $R^2 = 0.120$ , adjusted  $R^2 = 0.066$ .

Table S5. Multiple regression analysis of epigenetic age accelerations in the western-style dietary pattern.

|                                                         | B      | 95%CI           | $\beta$ | VIF   | <i>p</i>          |
|---------------------------------------------------------|--------|-----------------|---------|-------|-------------------|
| <b><i>AgeAccelGrim</i><sup>*1</sup></b>                 |        |                 |         |       |                   |
| Intercept                                               | -1.298 | -11.932 – 9.335 |         |       | 0.810             |
| Log <sup>10</sup> (Western-style dietary pattern score) | 3.664  | -0.322 – 7.650  | 0.142   | 1.027 | 0.071             |
| BMI                                                     | 0.037  | -0.168 – 0.242  | 0.029   | 1.104 | 0.724             |
| Exercise habit                                          | 0.466  | -0.806 – 1.738  | 0.058   | 1.059 | 0.470             |
| Smoking status                                          | -1.879 | -2.767 – -0.991 | -0.341  | 1.115 | <b>&lt; 0.001</b> |
| Drinking status                                         | -0.164 | -0.332 – 0.004  | -0.154  | 1.064 | 0.056             |
| Marital status                                          | 1.896  | -0.728 – 4.520  | 0.112   | 1.027 | 0.155             |
| Education status                                        | 0.382  | -2.249 – 3.012  | 0.023   | 1.056 | 0.755             |
| Income status                                           | -0.104 | -0.522 – 0.315  | -0.039  | 1.088 | 0.625             |
| <b><i>FitAgeAccel</i><sup>*2</sup></b>                  |        |                 |         |       |                   |
| Intercept                                               | 2.334  | -9.412 – 14.079 |         |       | 0.695             |
| Log <sup>10</sup> (Western-style dietary pattern score) | 2.594  | -1.808 – 6.997  | 0.097   | 1.027 | 0.246             |
| BMI                                                     | -0.161 | -0.387 – 0.065  | -0.121  | 1.104 | 0.162             |
| Exercise habit                                          | 0.481  | -0.924 – 1.886  | 0.057   | 1.059 | 0.499             |
| Smoking status                                          | -1.295 | -2.276 – -0.315 | -0.226  | 1.115 | <b>0.010</b>      |
| Drinking status                                         | -0.153 | -0.339 – 0.032  | -0.138  | 1.064 | 0.105             |
| Marital status                                          | 1.381  | -1.517 – 4.280  | 0.078   | 1.027 | 0.348             |
| Education status                                        | 0.681  | -2.224 – 3.586  | 0.039   | 1.056 | 0.644             |
| Income status                                           | -0.179 | -0.641 – 0.284  | -0.065  | 1.088 | 0.446             |

AgeAccel, age acceleration; B: partial regression coefficient; BMI: body mass index; CI: confidence interval;  $\beta$ : standard partial regression coefficient; VIF: variance inflation factor. <sup>\*1</sup>  $R^2 = 0.219$ , adjusted  $R^2 = 0.171$ ; <sup>\*2</sup>  $R^2 = 0.122$ , adjusted  $R^2 = 0.068$ .

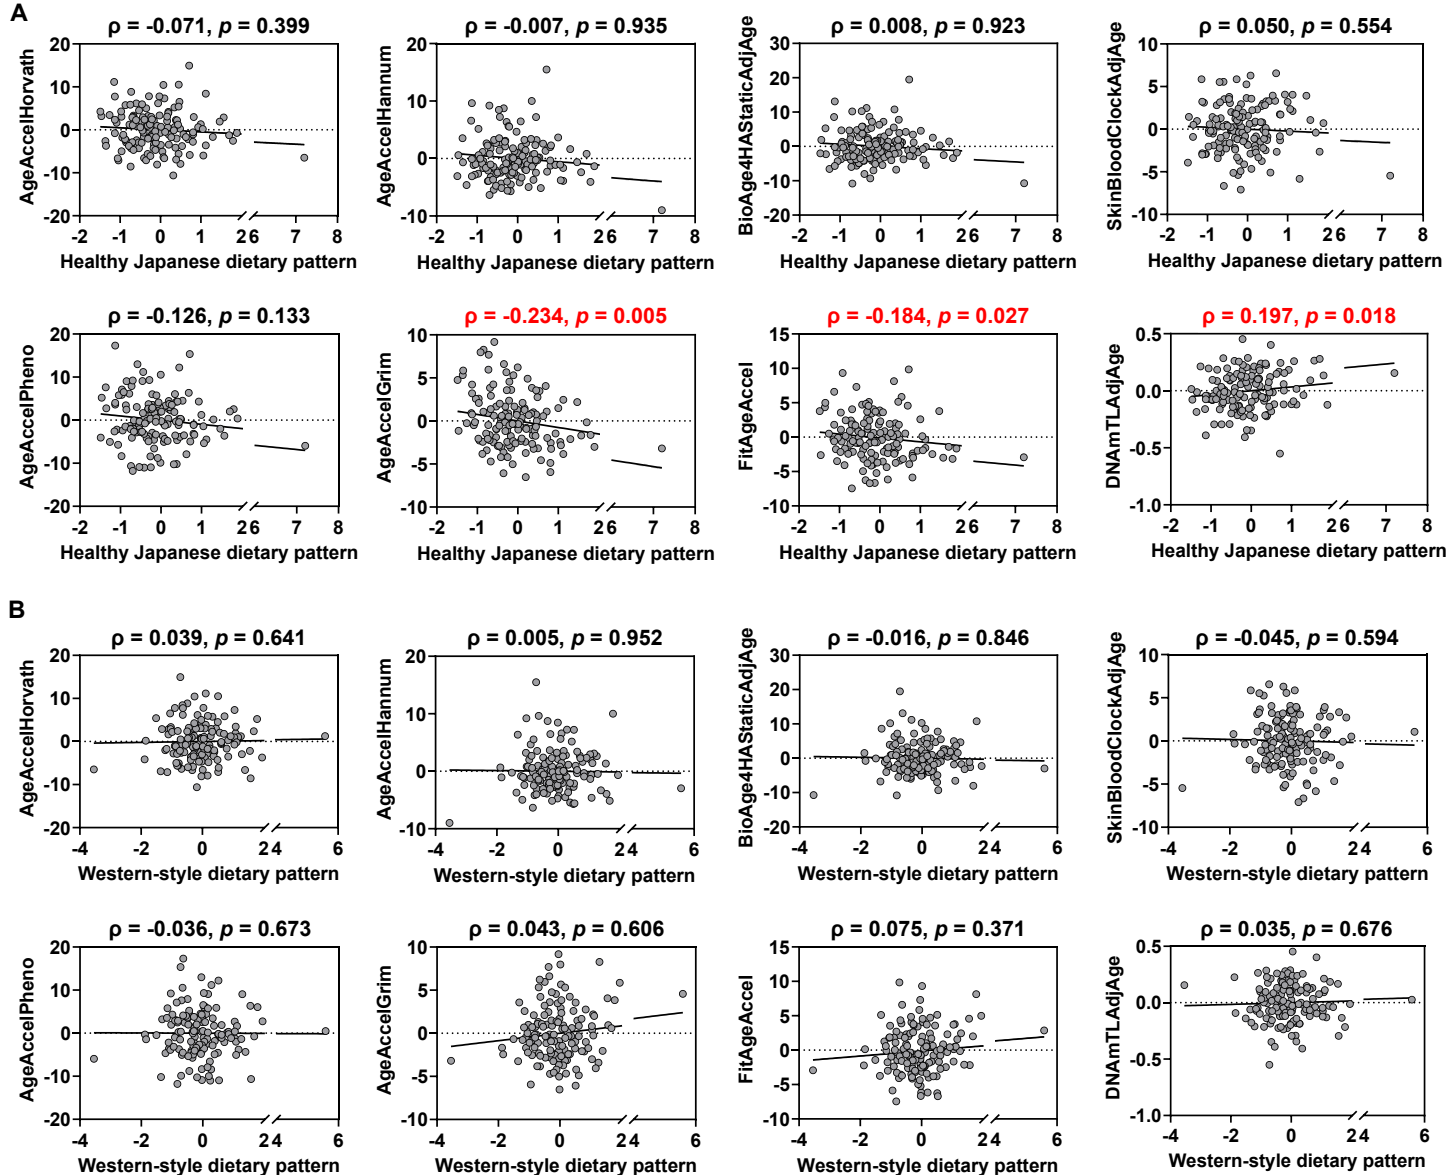

**Figure S1. Spearman correlation scatterplots.** **A)** Correlation between healthy Japanese dietary pattern scores and age acceleration (AgeAccel) and age adjusted (AdjAge) values for each epigenetic clock. **B)** Correlation between Western-style dietary pattern scores and AgeAccel and AdjAge values for each epigenetic clock. Red letters indicate that the correlation is significant.

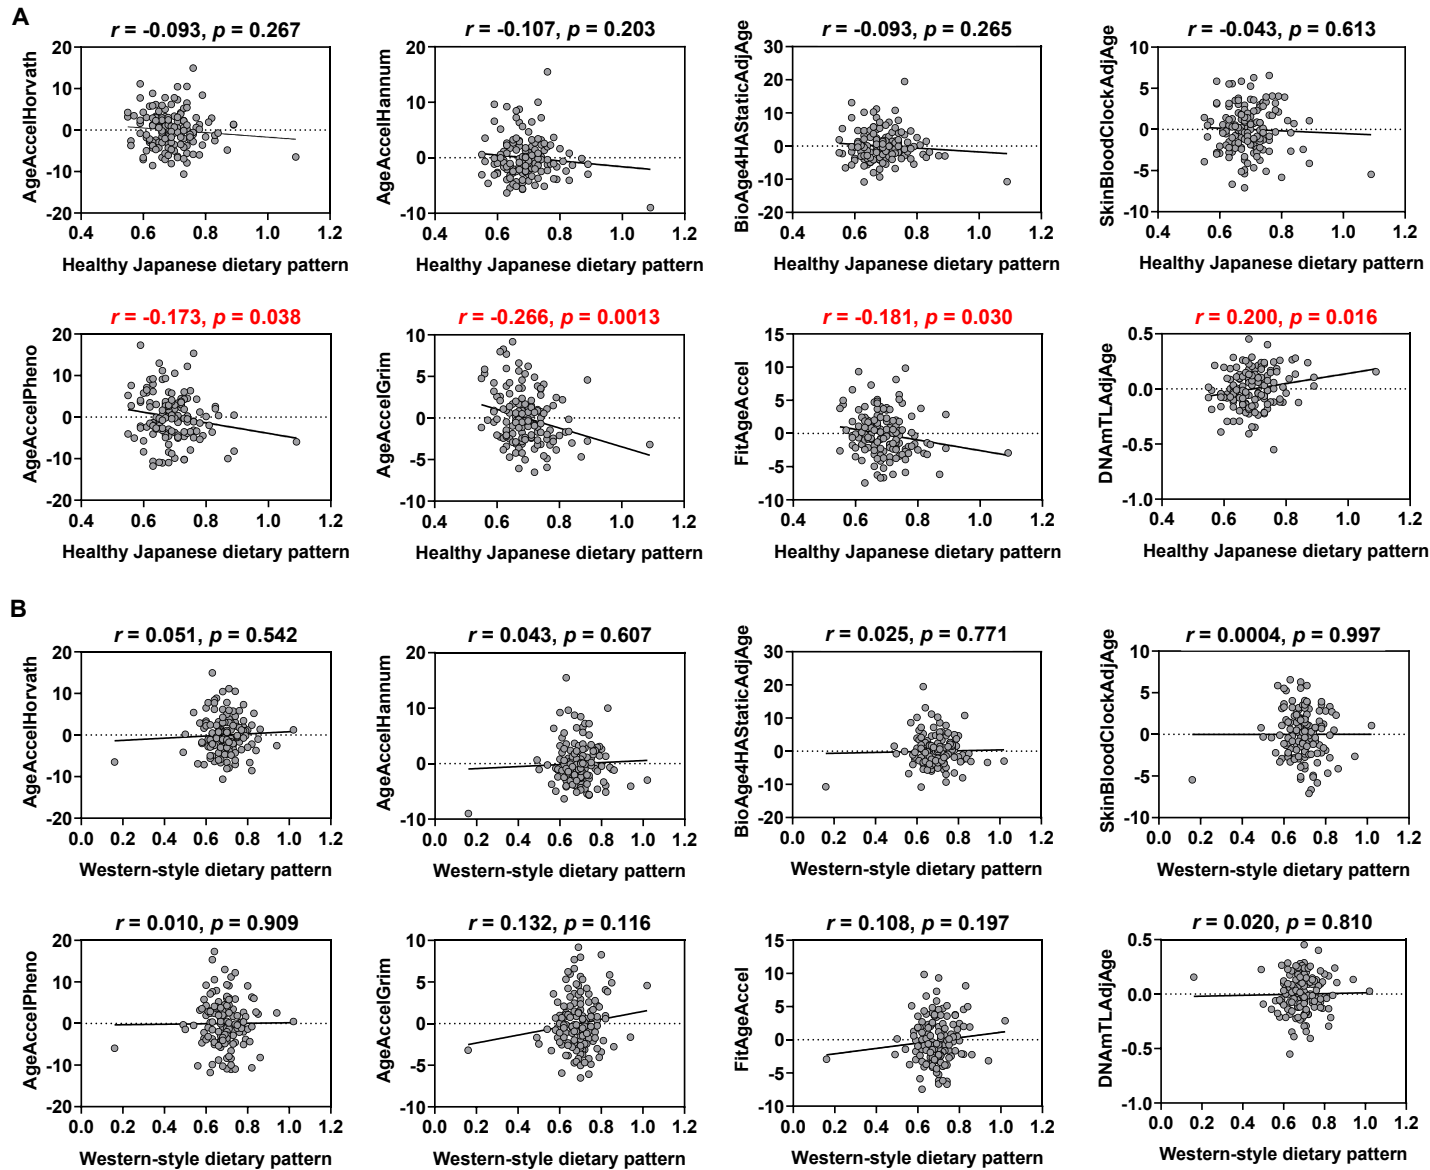

**Figure S2. Pearson correlation scatterplots.** **A)** Correlation between log<sub>10</sub> (healthy Japanese dietary pattern scores) and age acceleration (AgeAccel) and age adjusted (AdjAge) values for each epigenetic clock. **B)** Correlation between log<sub>10</sub> (western-style dietary pattern scores) and AgeAccel and AdjAge values for each epigenetic clock. Red letters indicate that the correlation is significant.
